# Supplementary material
Source: PubMed Central journal article supplement (PMC6715450)

Figure 1a

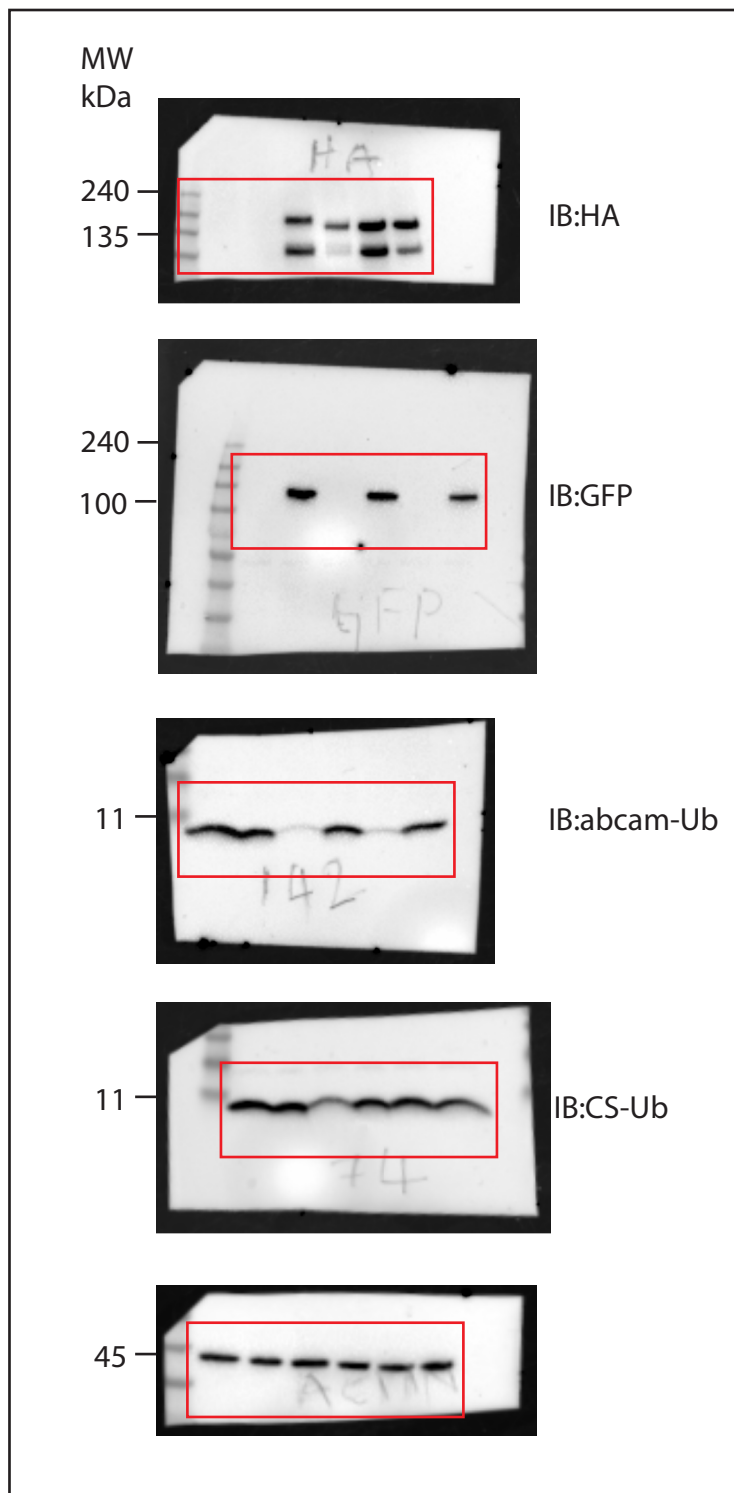

Figure 2b

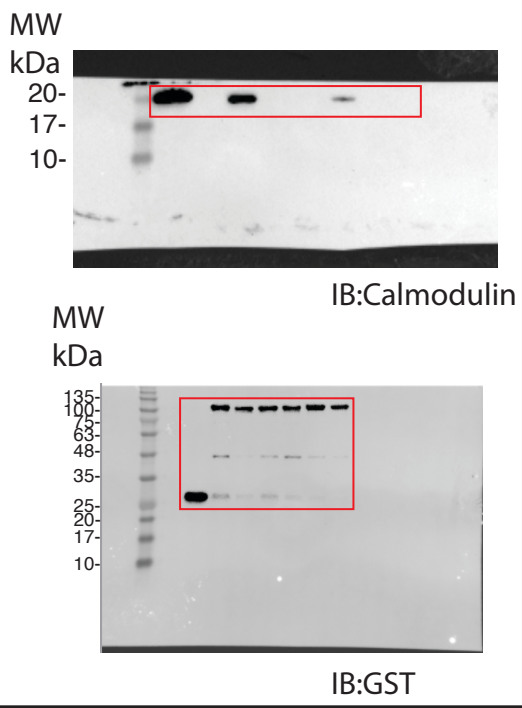

Figure 2c

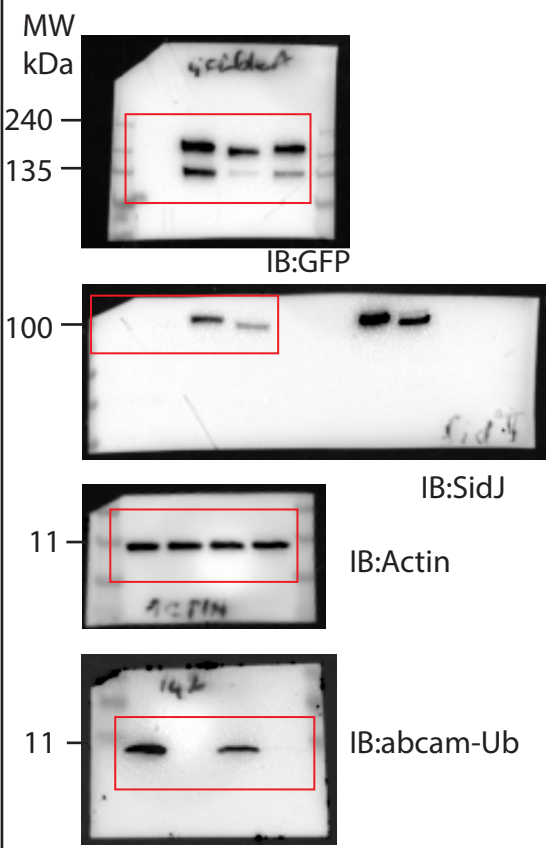

Figure 2e

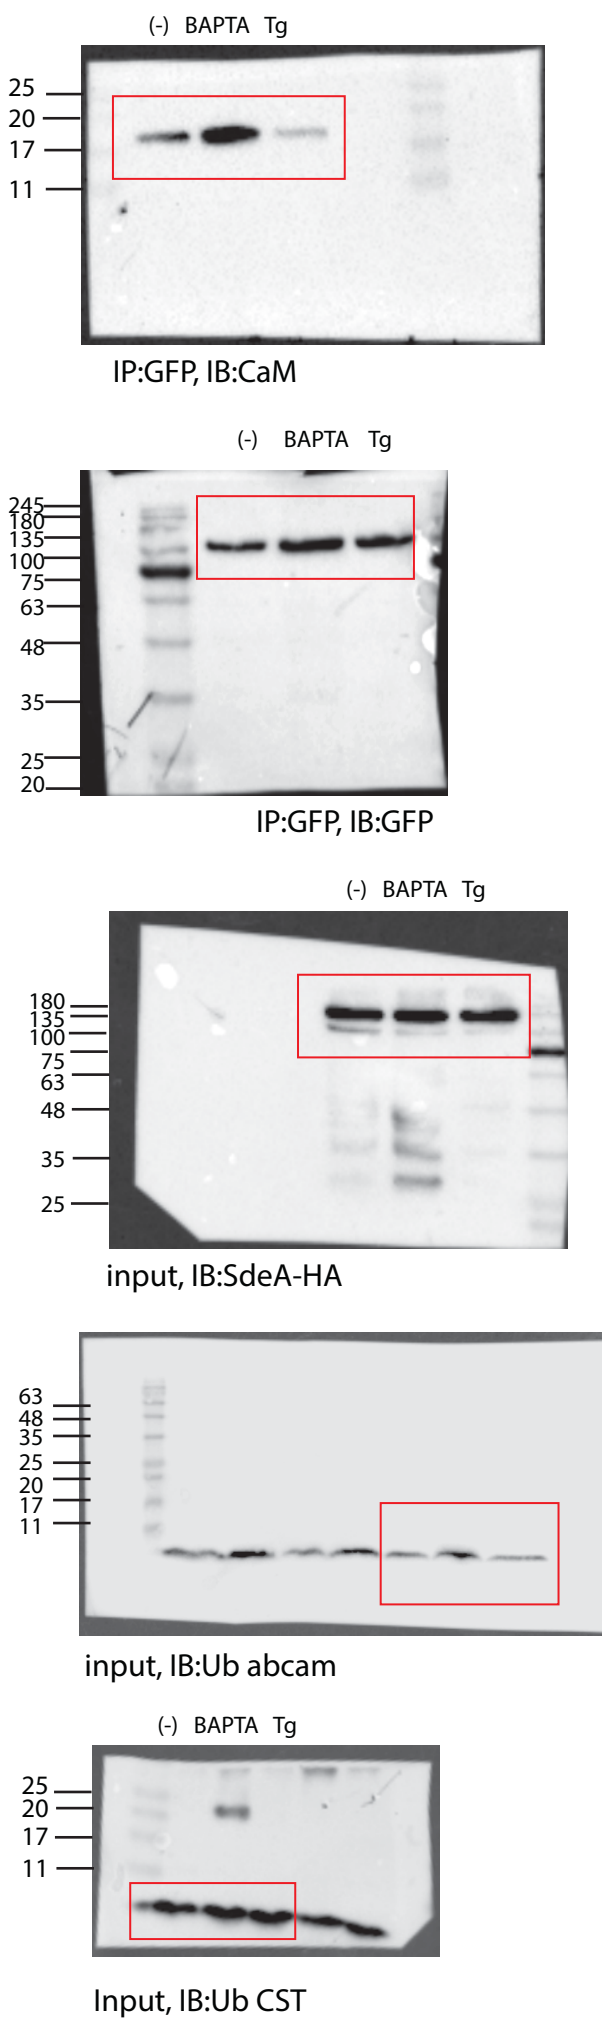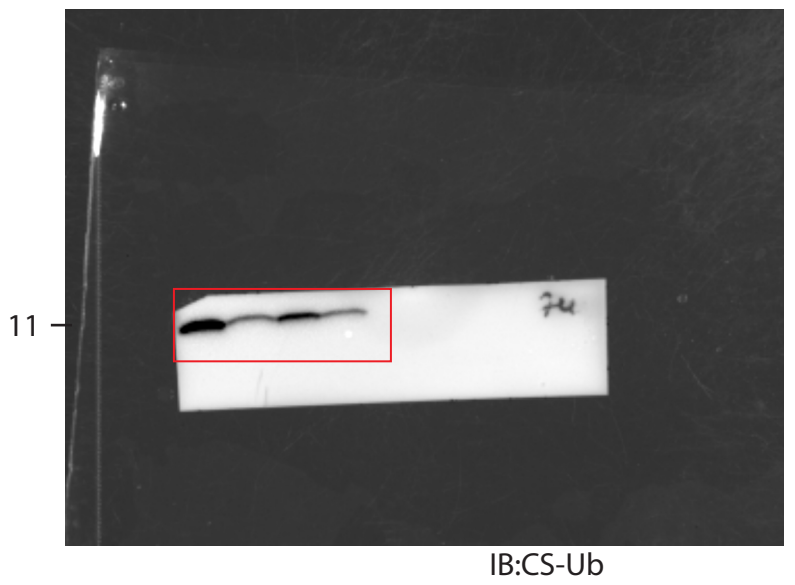

# Extended data figure 1b

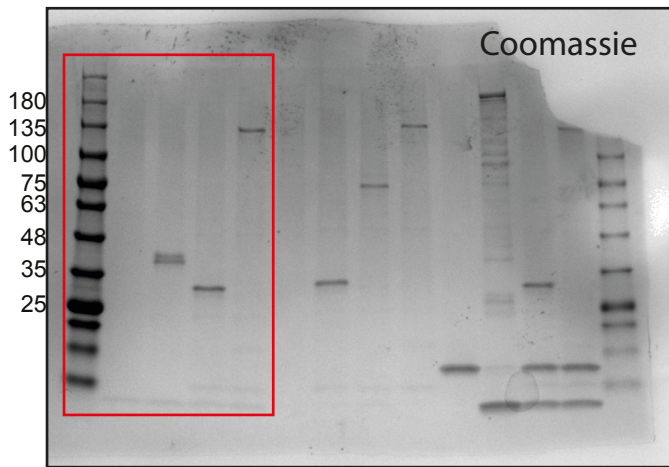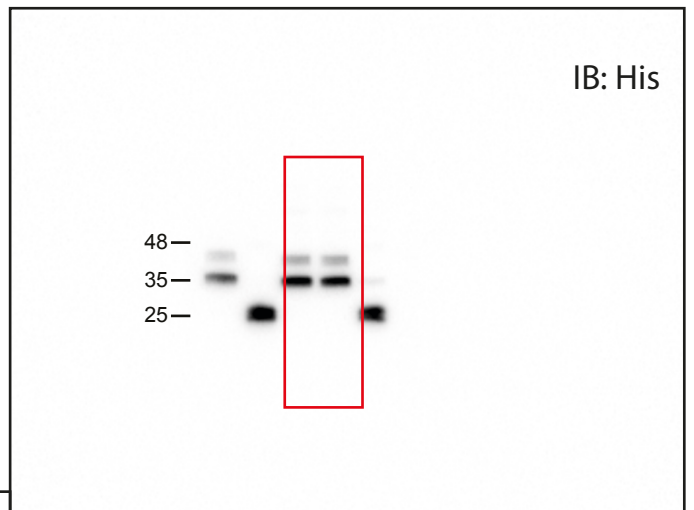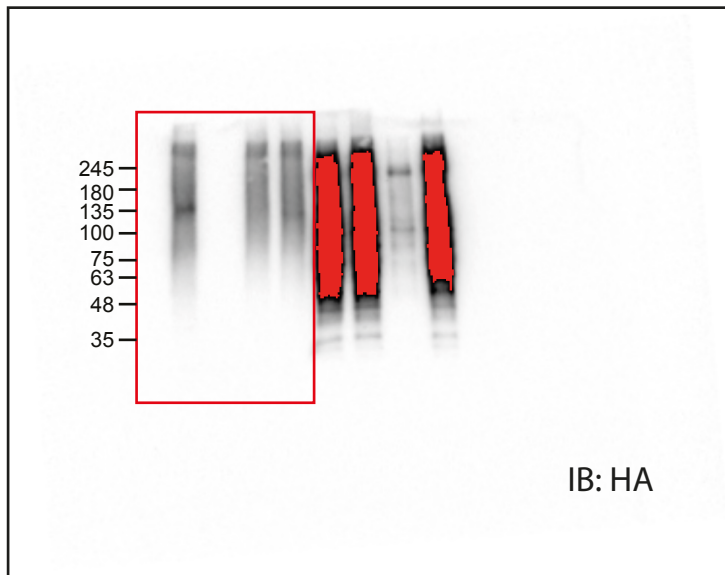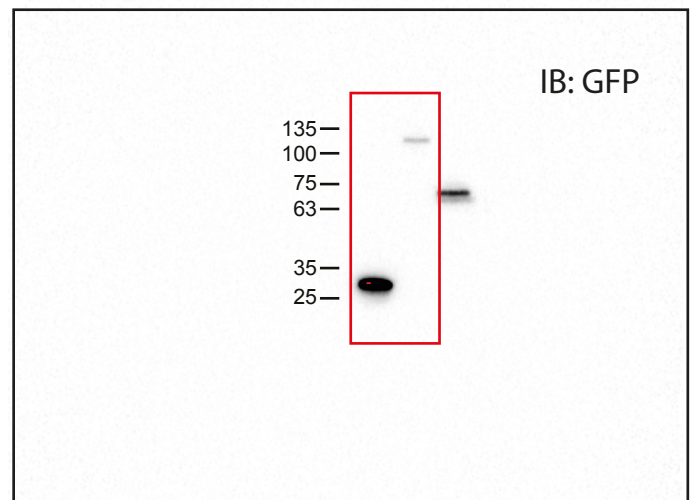

Extended data Figure 1c

Extended data figure 1c left (M1, K6 Ub)

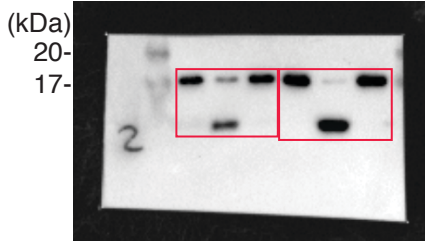

Extended data figure 1c right (top)

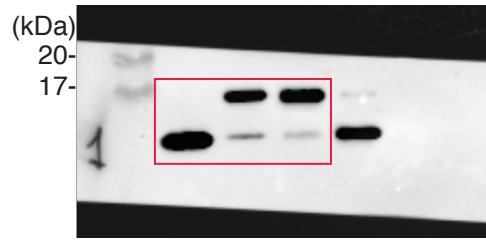

Extended data figure 1c left (K33 Ub)

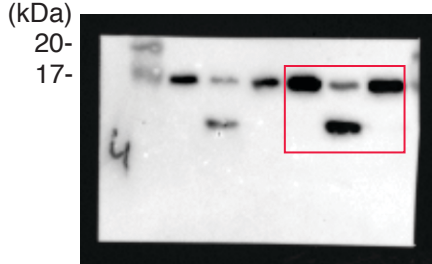

Extended data figure 1c right (bottom)

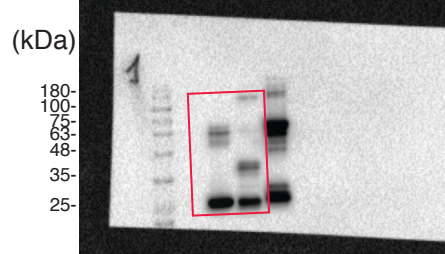

Extended data figure 1c left (K11, K27 Ub)

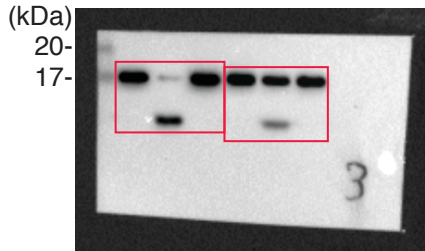

Extended data figure 1c left (K48, K63 Ub)

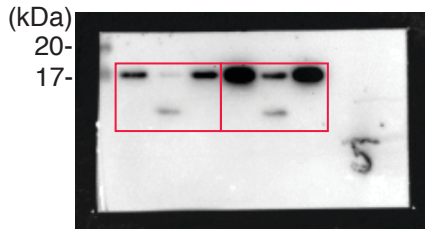

Extended data figure 1c left (K29 Ub)

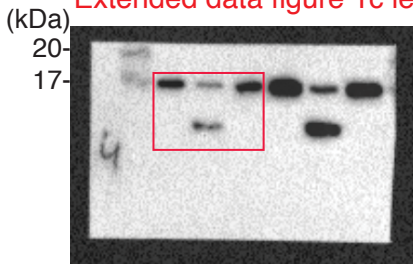



Extended data figure 2a

MW  
kDa

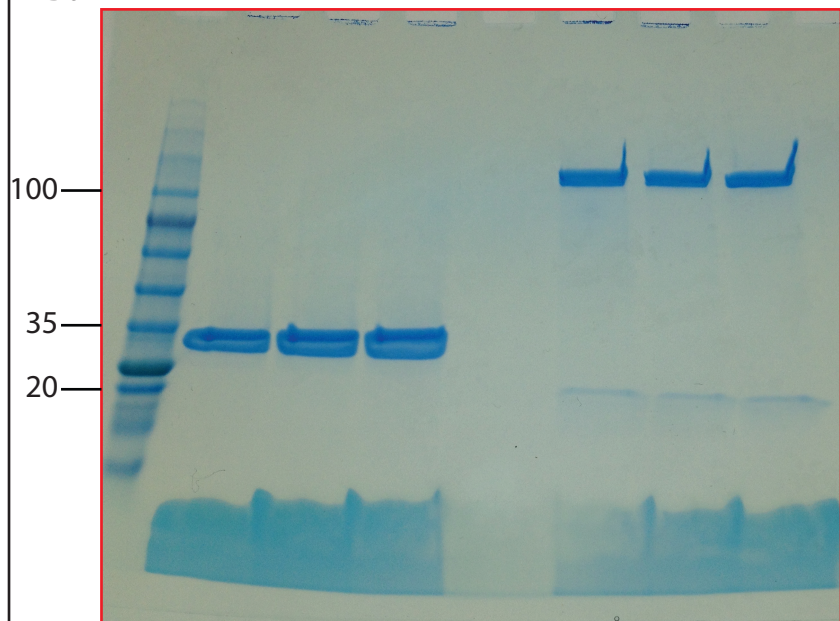

Extended data figure 6a

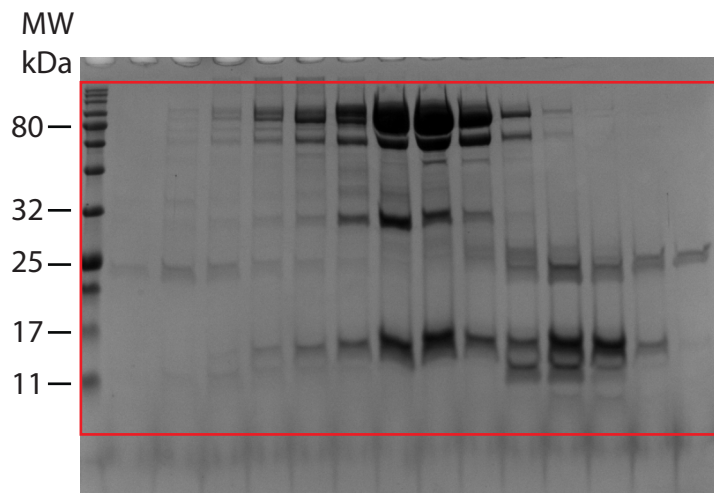

Extended data figure 10a

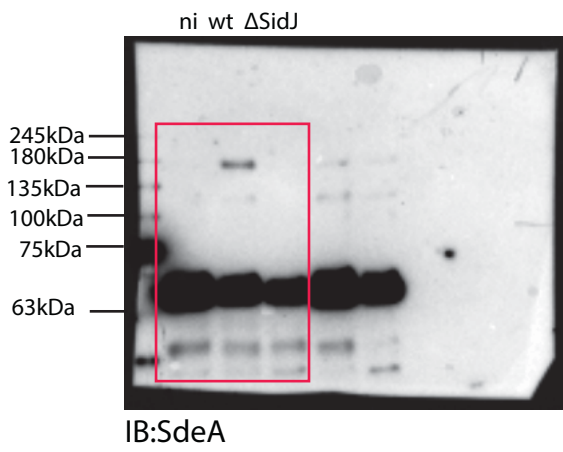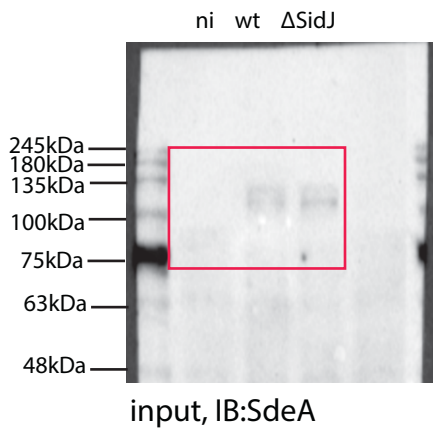

Supplement: EMS83679-supplement-Supplementary_Fig__1.pdf [file EMS83679-supplement-Supplementary_Fig__1.pdf]
